# Supplementary figures and images for: DJ‐1/FGFR‐1 Signaling Pathway Contributes to Sorafenib Resistance in Hepatocellular Carcinoma
Source: Hindawi journal article supplement (doi:10.1155/2022/2543220), 2022-01-01

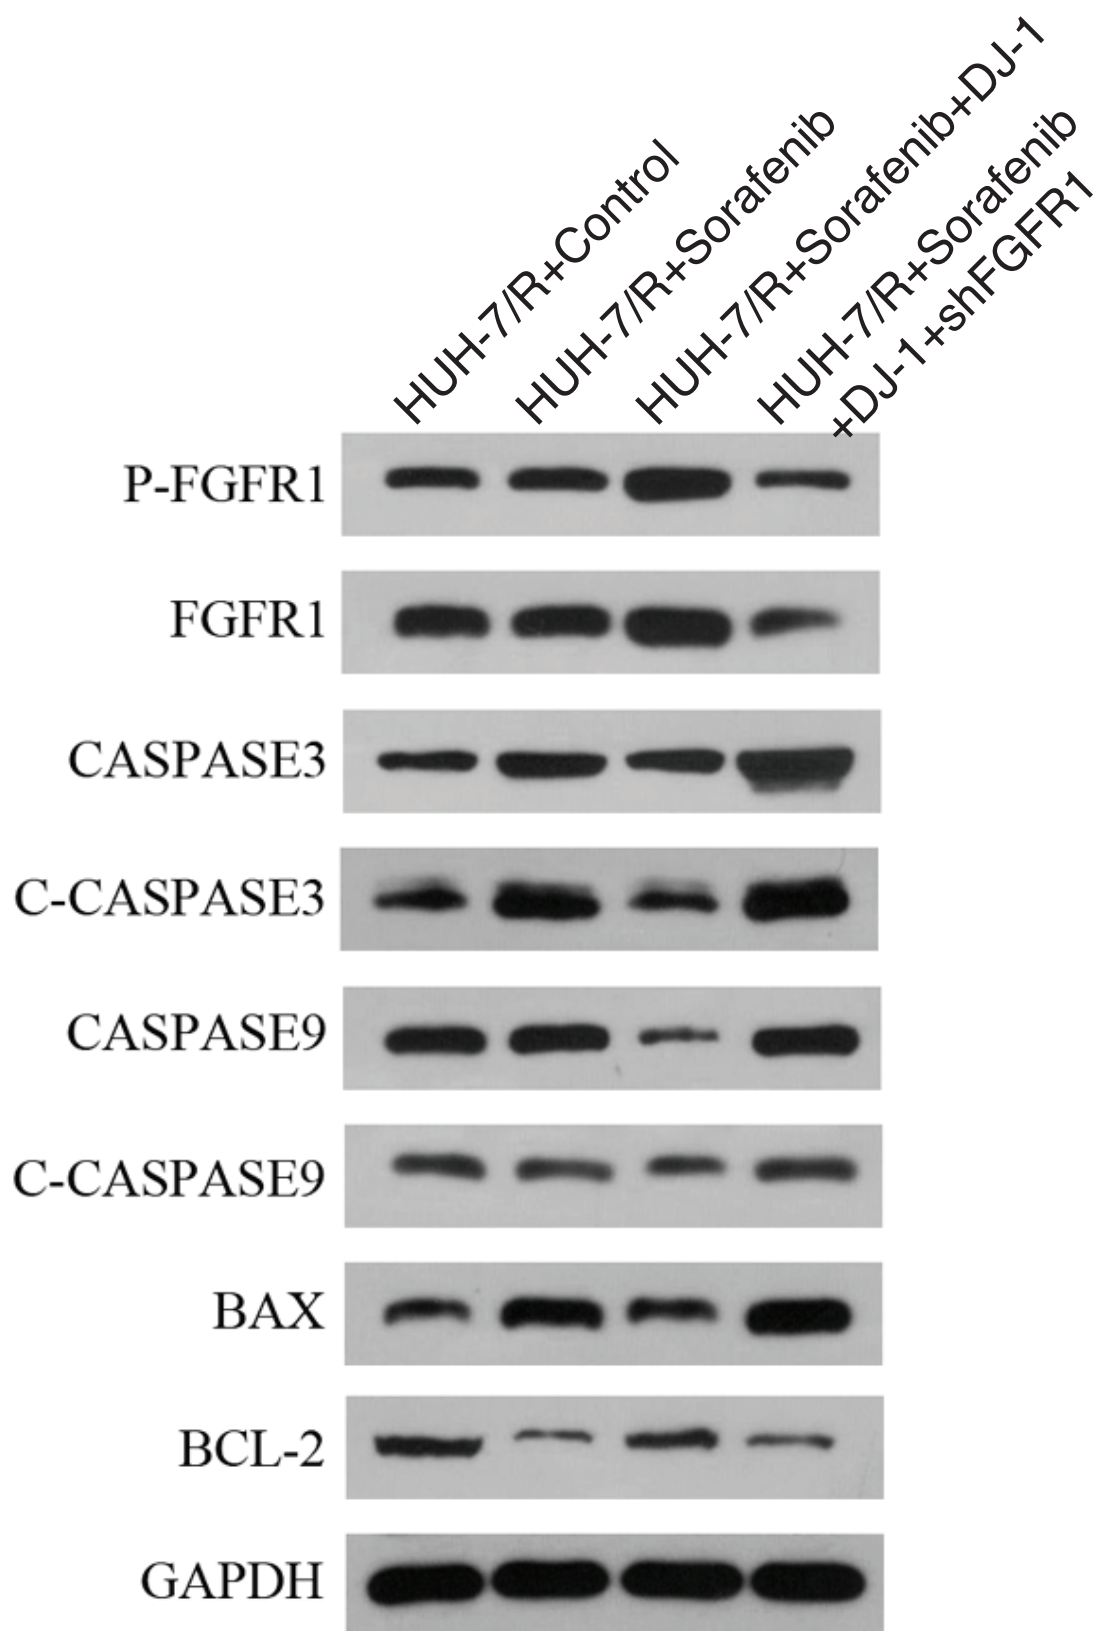

Chen et al Supplementary Figure 1

Supplement: f1 [file 2543220.f1.zip]

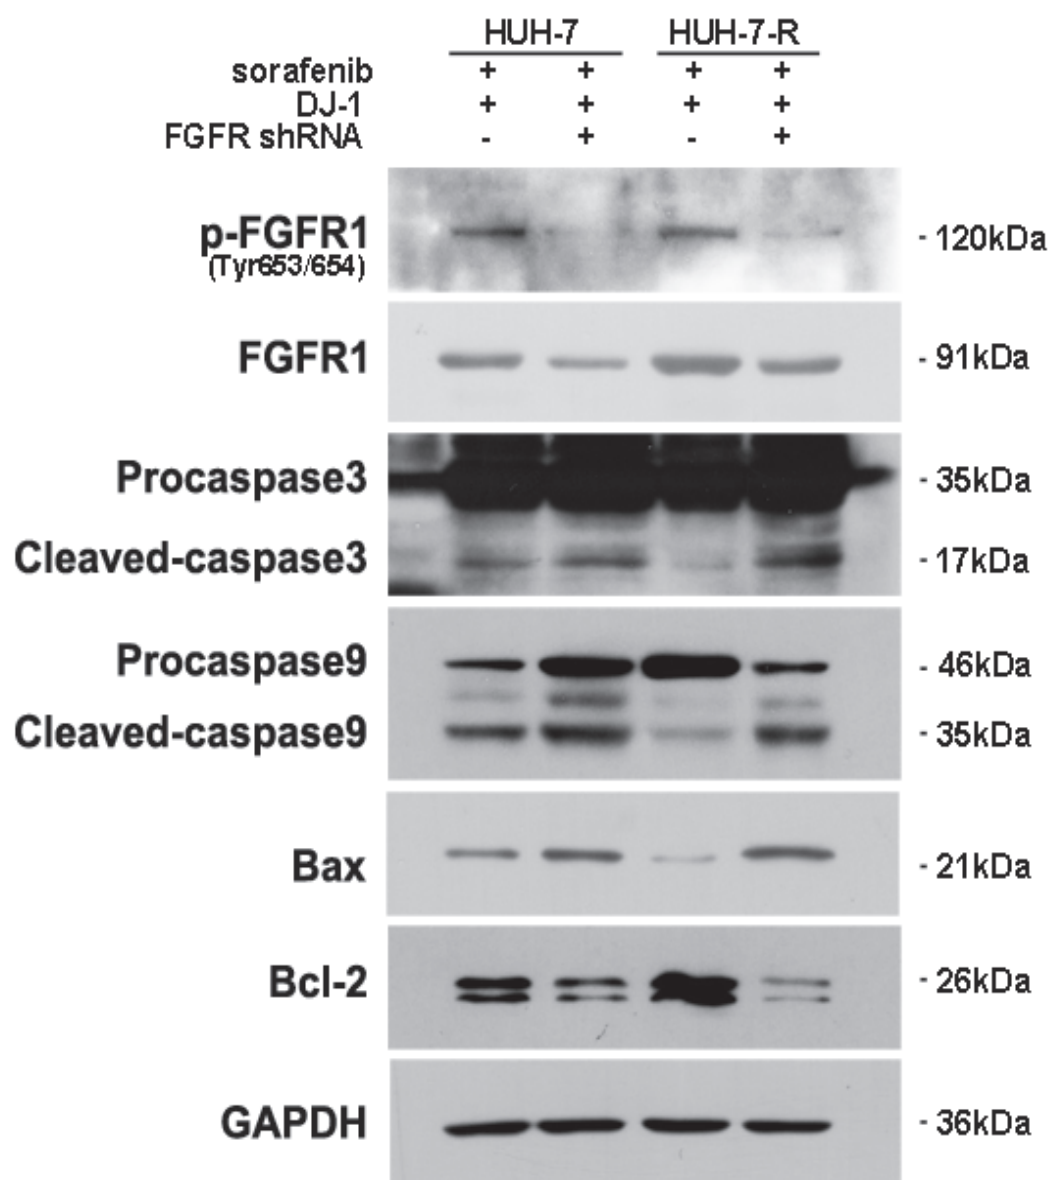

Chen et al Supplementary Figure 2

Supplement: f1 [file 2543220.f1.zip]
